# Supplementary material for: The ‘Feline Five’: An exploration of personality in pet cats (Felis catus)
Source: PubMed Central journal article supplement (PMC5568325; doi:10.1371/journal.pone.0183455), 2017-08-23
Supplement: pone.0183455.s004.pdf [file pone.0183455.s004.pdf]

## S4 Appendix: South Australia and New Zealand as independent samples

Scree plots and parallel analysis decision tables supporting two independent principal axis exploratory factor analyses.

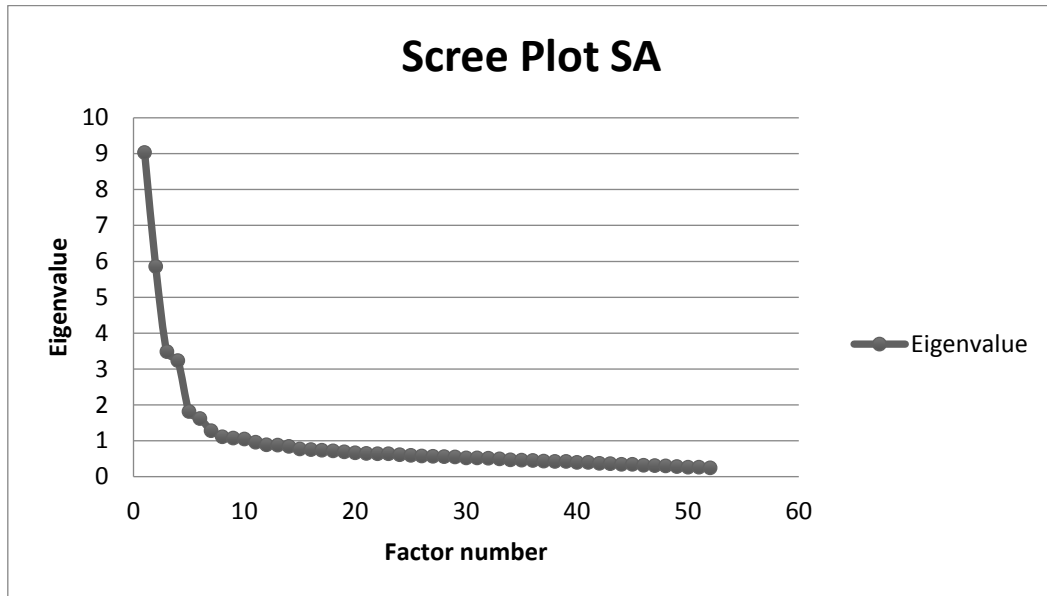

Fig A. Scree plot for the South Australian cats ( $n = 1,687$ ) subjected to principal axis factor analysis.

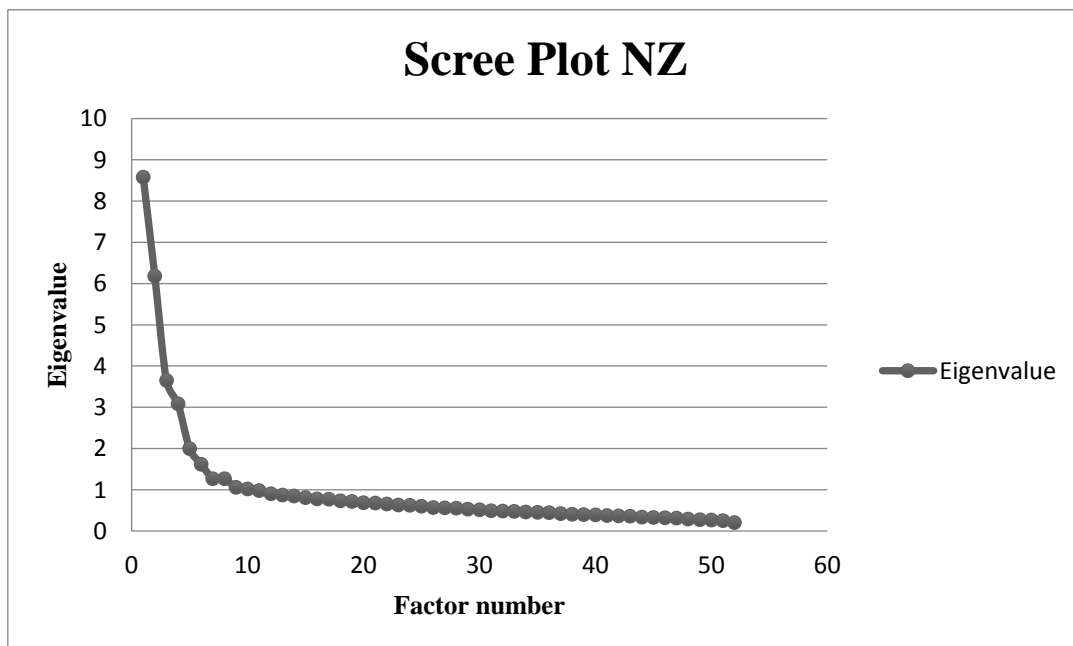

Fig B. Scree plot for the New Zealand cats ( $n = 1,115$ ) subjected to principal axis factor analysis.

Table A. Comparison of Eigenvalues from the PAF (SA) and Criterion Values from Parallel Analysis

| Factor number | Actual eigenvalue from PAF | Criterion value from parallel analysis | Decision      |
|---------------|----------------------------|----------------------------------------|---------------|
| 1             | 9.04                       | 1.35                                   | Accept        |
| 2             | 5.86                       | 1.32                                   | Accept        |
| 3             | 3.49                       | 1.30                                   | Accept        |
| 4             | 3.24                       | 1.28                                   | Accept        |
| 5             | 1.82                       | 1.26                                   | Accept/reject |
| 6             | 1.63                       | 1.24                                   | Accept/reject |
| 7             | 1.28                       | 1.22                                   | Accept/reject |
| 8             | 1.12                       | 1.21                                   | Reject        |

*Note.* PAF = Principal Axis Factor Analysis. SA = South Australia.

| Table B.<br>Comparison of<br>Eigenvalues from<br>the PAF (NZ) and<br>Criterion Values<br>from Parallel<br>AnalysisFactor<br>number | Actual eigenvalue from PAF | Criterion value from parallel analysis | Decision      |
|------------------------------------------------------------------------------------------------------------------------------------|----------------------------|----------------------------------------|---------------|
| 1                                                                                                                                  | 8.58                       | 1.44                                   | Accept        |
| 2                                                                                                                                  | 6.18                       | 1.40                                   | Accept        |
| 3                                                                                                                                  | 3.66                       | 1.37                                   | Accept        |
| 4                                                                                                                                  | 3.08                       | 1.34                                   | Accept        |
| 5                                                                                                                                  | 2.00                       | 1.32                                   | Accept/reject |
| 6                                                                                                                                  | 1.62                       | 1.30                                   | Accept/reject |
| 7                                                                                                                                  | 1.27                       | 1.28                                   | Accept/reject |
| 8                                                                                                                                  | 1.27                       | 1.26                                   | Accept/reject |
| 9                                                                                                                                  | 1.06                       | 1.24                                   | Reject        |

*Note.* PAF = Principal Axis Factor Analysis. NZ = New Zealand.
