# Supplementary material for: The ‘Feline Five’: An exploration of personality in pet cats (Felis catus)
Source: PLoS One. 2017 Aug 23;12(8):e0183455. doi: 10.1371/journal.pone.0183455 (PMC5568325; doi:10.1371/journal.pone.0183455)
Supplement: S6 Appendix — (PDF) [file pone.0183455.s006.pdf]

## S6 Appendix: Comparison of Factor Labels used in other animal and particularly felid studies compared with the current study.

Table A. Cross-Species Similarities from Previous Personality Research to Current Pet Cat

### Personality Research

| Study                | Species<br>(& environment)              | Personality<br>factor label | Traits                                                                                                                                                           |
|----------------------|-----------------------------------------|-----------------------------|------------------------------------------------------------------------------------------------------------------------------------------------------------------|
| <b>Current study</b> | <b>Domestic cat<br/>(private homes)</b> | <b>Neuroticism</b>          | <b>+Insecure +Anxious +Fearful of people +Suspicious +Shy<br/>+Tense +Fearful of other cats +Excitable –Trusting<br/>–Calm –Stable –Self-assured –Bold –Cool</b> |
| [37]                 | Domestic cat<br>(shelters)              | Neuroticism                 | +Anxious +Insecure +Tense +Suspicious +Fearful of people<br>–Stable –Trusting –Cool –Calm –Self-assured                                                          |
| [37]                 | Five felids                             | Neuroticism                 | +Fearful of people +Suspicious +Insecure +Tense +Anxious<br>+Fearful of conspecifics –Trusting –Cool –Calm–Self-<br>assured –Stable                              |
| [47]                 | Snow leopard<br>(zoos)                  | Timid-anxious               | +Anxious +Insecure +Tense +Excitable                                                                                                                             |
| [20]                 | Cheetah (zoos)                          | Tense-fearful               | +Fearful of conspecifics +Fearful of people +Insecure<br>+Tense –Calm –Self-assured                                                                              |
| <b>Current study</b> | <b>Domestic cat<br/>(private homes)</b> | <b>Extraversion</b>         | <b>+Decisive +Smart +Curious +Inventive +Active<br/>+Inquisitive +Vigilant +Deliberate +Persevering<br/>–Aimless –Clumsy –Quitting</b>                           |
| [47]                 | Snow leopard<br>(zoos)                  | Active/vigilant             | +Active +Vigilant                                                                                                                                                |
| [66]                 | Bengal tiger<br>(zoo)                   | Extraversion                | +Vigilant +Active                                                                                                                                                |
| [25]                 | Domestic cat<br>(private homes)         | Active                      | +Curious +Active +Vigilant                                                                                                                                       |
| [59]                 | Orangutan (zoos)                        | Extraversion                | +Active +Curious +Inquisitive +Inventive                                                                                                                         |
| [20]                 | Cheetah (zoos)                          | Excitable-<br>vocal         | +Active +Smart                                                                                                                                                   |
| [19]                 | Scottish wildcat<br>(zoos)              | Self-control                | +Decisive +Persevering +Smart –Aimless –Quitting                                                                                                                 |
| <b>Current study</b> | <b>Domestic cat<br/>(private homes)</b> | <b>Dominance</b>            | <b>+Bullying +Dominant +Aggressive to other cats +Jealous<br/>+Defiant +Greedy –Submissive –Friendly to other cats</b>                                           |
| [37]                 | Domestic cat<br>(shelters)              | Dominance                   | +Aggressive to conspecifics +Bullying +Dominant +Jealous<br>+Stingy –Submissive –Friendly to conspecifics                                                        |
| [37]                 | Five felids                             | Dominance                   | +Dominant +Aggressive to conspecifics +Stingy +Bullying<br>+Jealous                                                                                              |
| [19]                 | Scottish wildcat<br>(zoos)              | Dominance                   | +Dominant +Bullying +Stingy +Aggressive to conspecifics<br>+Jealous –Friendly to conspecifics                                                                    |
| <b>Current study</b> | <b>Domestic cat<br/>(private homes)</b> | <b>Impulsiveness</b>        | <b>+Impulsive +Erratic +Reckless +Distractible<br/>–Predictable –Constrained</b>                                                                                 |
| [37]                 | Domestic cat<br>(shelters)              | Impulsiveness               | –Constrained +Impulsive +Distractible +Reckless +Erratic –<br>Predictable                                                                                        |
| <b>Current study</b> | <b>Domestic cat<br/>(private homes)</b> | <b>Agreeableness</b>        | <b>+Affectionate +Friendly to people +Gentle +Playful<br/>+Cooperative –Solitary –Irritable –Aggressive to people</b>                                            |
| [19]                 | Scottish wildcat<br>(zoos)              | Agreeableness               | +Cooperative +Friendly to people +Playful                                                                                                                        |
| [59]                 | Orangutan (zoos)                        | Agreeableness               | +Affectionate +Friendly +Gentle                                                                                                                                  |

Note. Five felids = domestic cat (shelters), clouded leopard (zoos), Scottish wildcat (zoos), snow leopard (zoos), African lion (zoos). Conspecifics = the same species. Greedy = ‘Stingy’ in other research.
